# Supplementary material for: Cortisol, cognition and Alzheimer’s disease biomarkers among memory clinic patients
Source: HighWire-hosted journal article supplement (doi:10.1136/bmjno-2022-000344), 2022-10-01
Supplement: bmjno-2022-000344supp001_data_supplement.pdf [file bmjno-2022-000344supp001_data_supplement.pdf]

**Supplemental Table 1.** Characteristics of study participants in percentages or means (and standard deviations), for participants included at follow-up (FU) and SCI/MCI participants not included at follow-up (No FU).

| <i>Means &amp; Percentages, t-tests unless otherwise indicated</i> | <b>n</b>   | <b>Follow-Up</b> | <b>No Follow-up</b> | <i>p (X<sup>2</sup>/ t)</i> |
|--------------------------------------------------------------------|------------|------------------|---------------------|-----------------------------|
|                                                                    | (FU/No FU) | (n=57)           | (n=66)              |                             |
| Age (years)                                                        | (57/66)    | 60.98 (6.39)     | 61.84 (8.05)        | .517                        |
| Education (years)                                                  | (57/66)    | 14.10 (3.39)     | 14.21 (3.38)        | .857                        |
| Female (% , X <sup>2</sup> )                                       | (57/66)    | 59.6             | 56.1                | .688                        |
| Stress measures                                                    |            |                  |                     |                             |
| Perceived Stress Scale ( __ /40)                                   | (54/60)    | 18.89 (7.13)     | 17.85 (7.40)        | .448                        |
| Cortisol                                                           |            |                  |                     |                             |
| Awakening Cortisol (t1) (nmol/l)                                   | (57/66)    | 8.76 (4.91)      | 8.53 (4.90)         | .797                        |
| Bedtime Cortisol (t6) (nmol/l)                                     | (57/66)    | 2.48 (3.79)      | 2.24 (3.64)         | .718                        |
| Cortisol Awakening Response                                        | (57/66)    | .53 (1.17)       | .75 (1.39)          | .347                        |
| Daily Cortisol Output                                              | (57/66)    | 3.92 (.70)       | 4.04 (.69)          | .340                        |
| Cortisol AM/PM ratio (t1/t6)                                       | (57/66)    | 2.04 (.75)       | 2.00 (.70)          | .792                        |
| CSF Biomarkers                                                     |            |                  |                     |                             |
| Aβ <sub>42</sub> (ng/l)                                            | (46/58)    | 889.13 (153.80)  | 712.19 (227.94)     | < .001 ***                  |
| T-Tau (ng/l)                                                       | (46/58)    | 286.67 (105.27)  | 311.76 (182.41)     | .382                        |
| P-Tau (ng/l)                                                       | (46/58)    | 41.78 (13.63)    | 44.88 (21.10)       | .368                        |
| Cognition                                                          |            |                  |                     |                             |
| Overall cognition (mean z-score)                                   | (47/54)    | -.54 (.91)       | -.61 (.90)          | .688                        |
| Memory (mean z-score)                                              | (51/58)    | -.33 (.91)       | -1.09 (1.35)        | .001 **                     |
| Processing Speed (mean z-score)                                    | (48/53)    | -.54 (1.16)      | -.66 (1.33)         | .654                        |
| Working Memory (mean z-score)                                      | (43/48)    | -.37 (.84)       | -.66 (1.12)         | .169                        |
| Perceptual Reasoning (mean z-score)                                | (49/54)    | -.15 (.87)       | -.38 (1.03)         | .234                        |
| Currently taking cortisone (% , X <sup>2</sup> )                   | (57/66)    | 12.3             | 10.6                | .771                        |

\* significant at p &lt; .05; \*\* significant at p &lt; .01, \*\*\* significant at p &lt; .001
